# Supplementary material
Source: publisher site journal article supplement (http://kjim.org/upload/media/kjim-2019-039-suppl5.pdf)
Supplement: Supplementary file 1 [file kjim-2019-039-suppl5.pdf]

**Supplementary Table 5. Lesion and procedural characteristics according to the presence of chronic total occlusion**

| Characteristic               | TASC (A, B) (n = 781) |                    |         | TASC (C, D)     |                    |         |
|------------------------------|-----------------------|--------------------|---------|-----------------|--------------------|---------|
|                              | POBA (n = 262)        | Stenting (n = 333) | p value | POBA (n = 358)  | Stenting (n = 605) | p value |
| ABI target                   | 0.72 ± 0.26           | 0.64 ± 0.20        | 0.001   | 0.58 ± 0.22     | 0.52 ± 0.20        | 0.001   |
| ABI nontarget                | 0.85 ± 0.25           | 0.81 ± 0.21        | 0.126   | 0.78 ± 0.26     | 0.73 ± 0.24        | 0.035   |
| Aortoiliac lesion            | 36 (13.7)             | 83 (24.9)          | 0.001   | 42 (11.7)       | 189 (31.2)         | < 0.001 |
| Below-the-knee lesion        | 142 (54.2)            | 87 (26.1)          | < 0.001 | 186 (52.0)      | 216 (35.7)         | < 0.001 |
| TASC                         |                       |                    | 0.166   |                 |                    | 0.916   |
| A                            | 100 (38.2)            | 147 (44.1)         |         |                 |                    |         |
| B                            | 162 (61.8)            | 186 (55.9)         |         |                 |                    |         |
| C                            |                       |                    |         | 163 (45.5)      | 272 (45.0)         |         |
| D                            |                       |                    |         | 195 (54.5)      | 333 (55.0)         |         |
| Diameter stenosis, %         | 83.49 ± 13.28         | 86.43 ± 13.22      | 0.007   | 93.73 ± 10.14   | 95.75 ± 8.40       | 0.002   |
| Lesion length, cm            | 81.05 ± 65.05         | 84.96 ± 57.43      | 0.470   | 186.35 ± 107.87 | 216.02 ± 107.49    | < 0.001 |
| Maximal balloon diameter, mm | 5.18 ± 1.35           | 5.51 ± 2.27        | 0.035   | 5.29 ± 0.90     | 5.65 ± 2.61        | 0.003   |
| Balloon length, mm           | 147.30 ± 36.51        | 109.81 ± 107.24    | 0.001   | 174.12 ± 142.82 | 141.44 ± 109.45    | 0.001   |
| Max stent diameter, mm       |                       | 6.79 ± 3.23        |         |                 | 6.89 ± 2.78        |         |
| Stent length sum, mm         |                       | 100.65 ± 56.57     |         |                 | 145.17 ± 83.67     |         |
| Technical success            |                       |                    | 0.001   |                 |                    | < 0.001 |
| No                           | 4 (1.6)               | 5 (1.5)            |         | 25 (7.1)        | 19 (3.2)           |         |
| Sub-optimal                  | 29 (11.3)             | 11 (3.3)           |         | 33 (9.4)        | 16 (2.7)           |         |
| Yes                          | 224 (87.2)            | 315 (95.2)         |         | 294 (83.5)      | 560 (94.1)         |         |
| Good antegrade flow          | 248 (96.5)            | 321 (97.0)         | 0.927   | 325 (92.3)      | 569 (95.6)         | 0.047   |
| Residual stenosis, < 30%     | 228 (88.7)            | 322 (97.3)         | < 0.001 | 293 (83.2)      | 565 (95.0)         | < 0.001 |
| Contrast volume, mL          | 162.85 ± 8.32         | 156.81 ± 102.70    | 0.497   | 172.26 ± 81.26  | 182.91 ± 90.78     | 0.125   |
| Clinical success             | 145 (55.3)            | 241 (72.4)         | < 0.001 | 191 (53.4)      | 422 (69.8)         | < 0.001 |
| Post-ABI                     | 0.88 ± 0.21           | 0.89 ± 0.17        | 0.554   | 0.79 ± 0.24     | 0.83 ± 0.19        | 0.082   |

Values are presented as mean ± SD or number (%).

TASC, TransAtlantic Inter-Society Consensus classification; POBA, plain old balloon angioplasty; ABI, ankle-brachial index.
